# Supplementary material for: Pre- and post-diagnostic dairy intake in relation to recurrence and all-cause mortality in people with stage I-III colorectal cancer
Source: PubMed Central journal article supplement (PMC10468734; doi:10.1007/s00394-023-03201-0), 2023-07-02

**CRC recurrence**

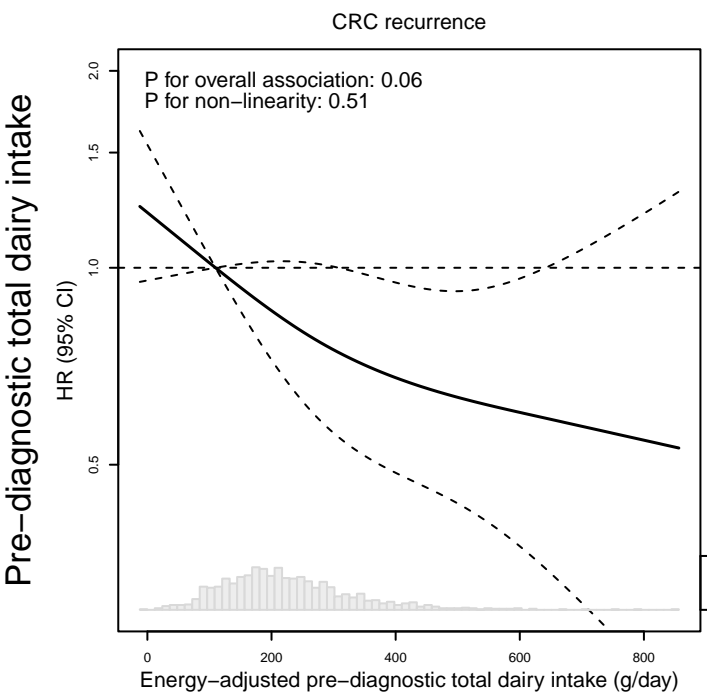

**All-cause mortality**

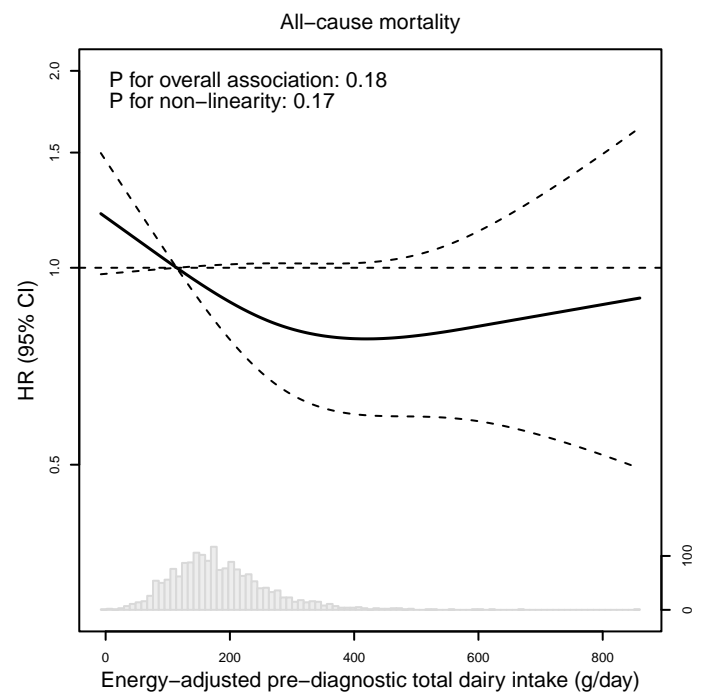

**CRC recurrence**

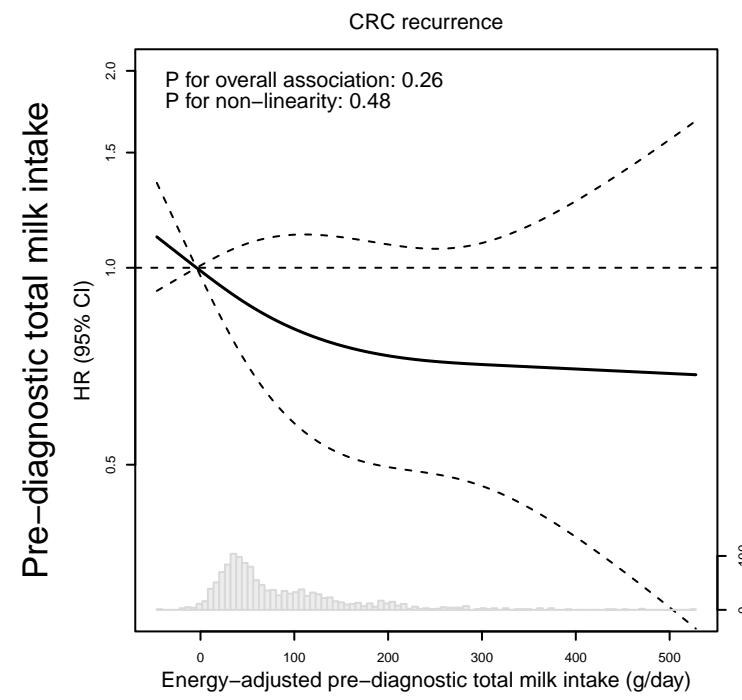

**All-cause mortality**

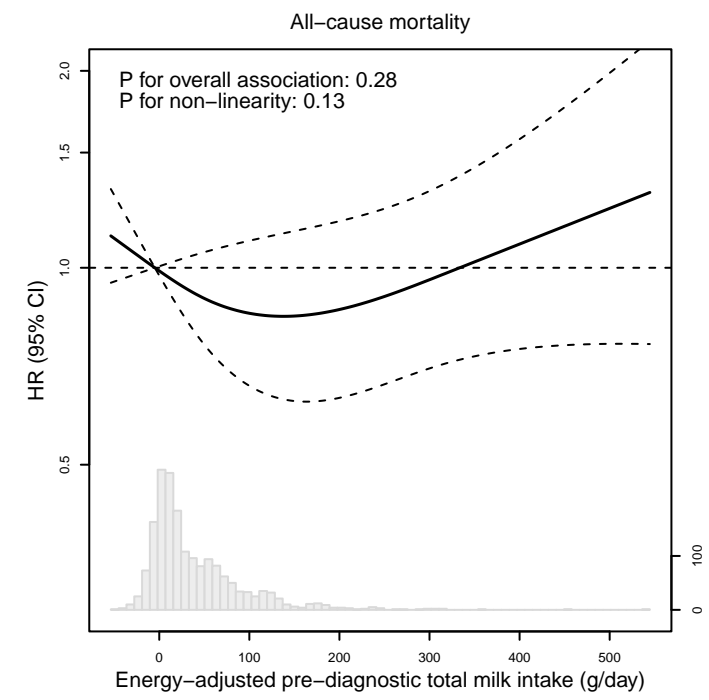

**Post-diagnostic total dairy intake**

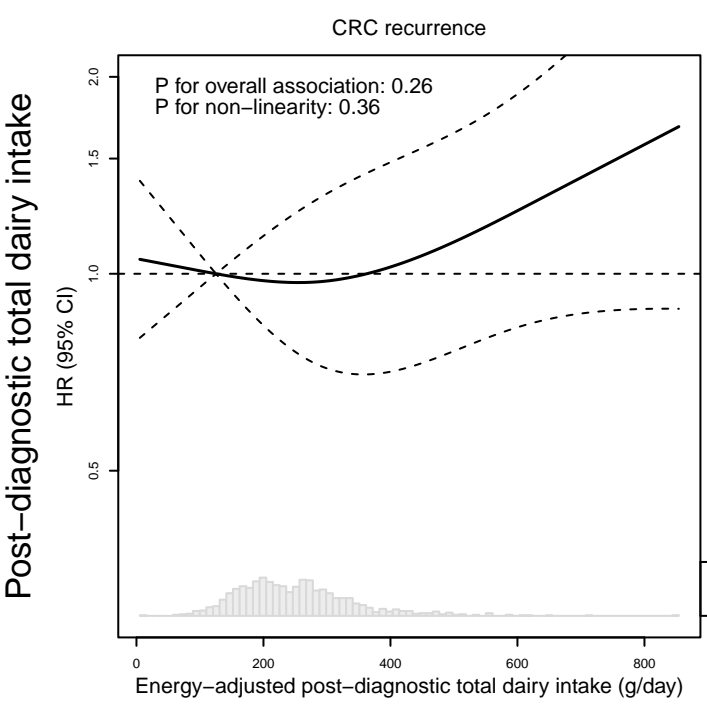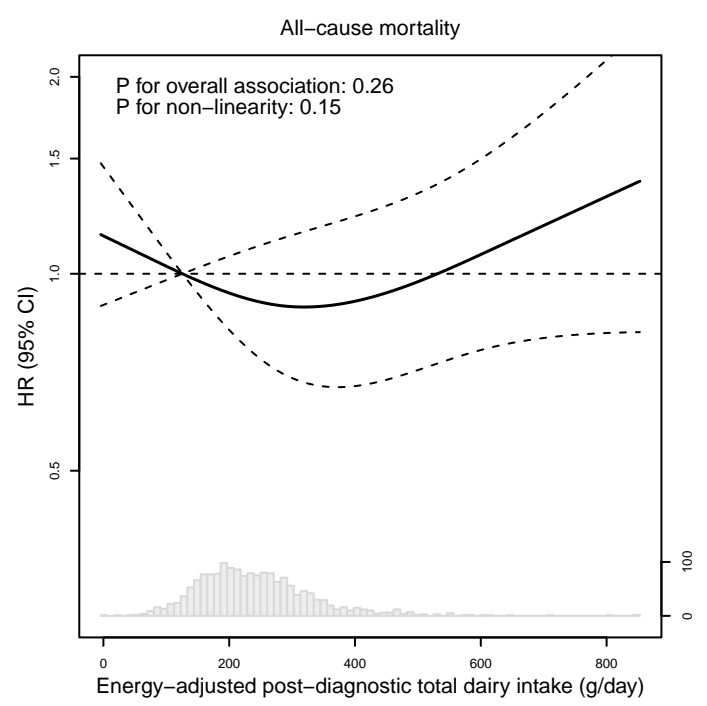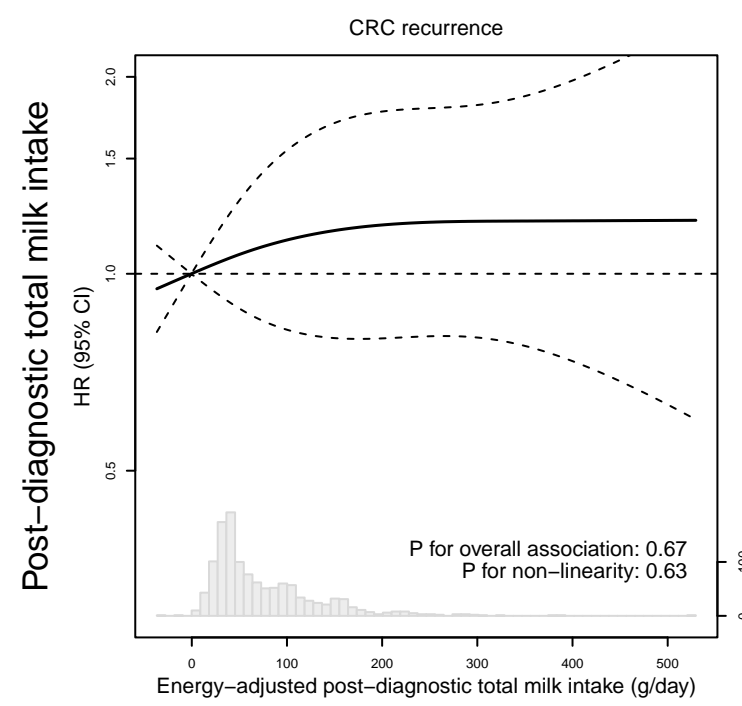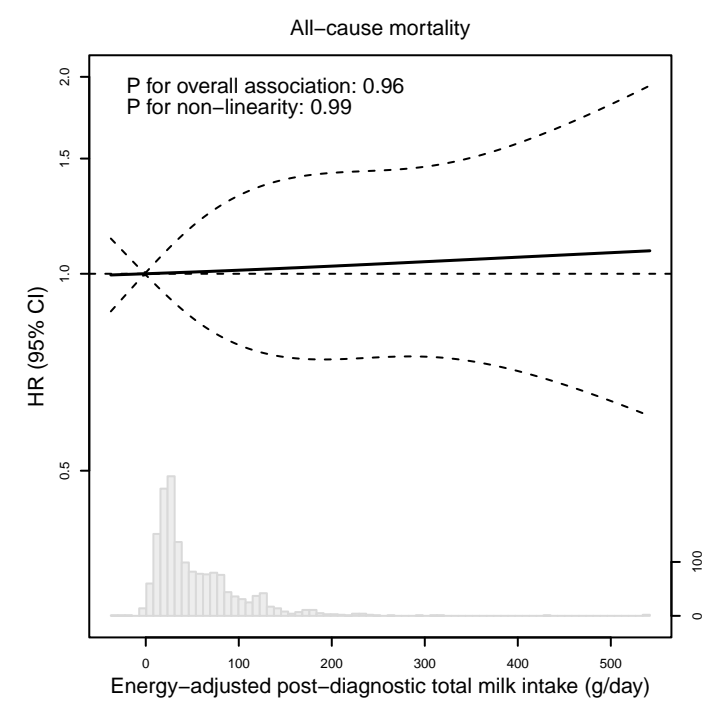

**Pre-diagnostic total yoghurt intake**

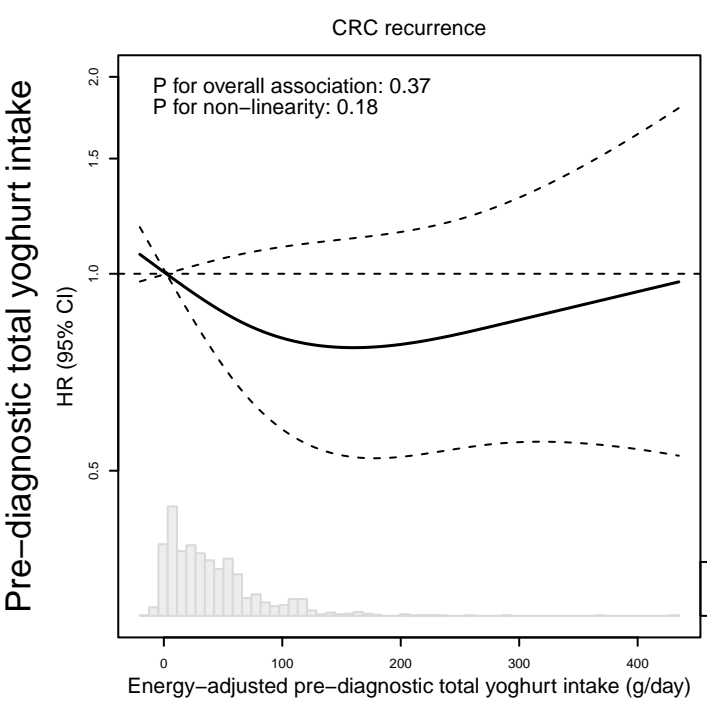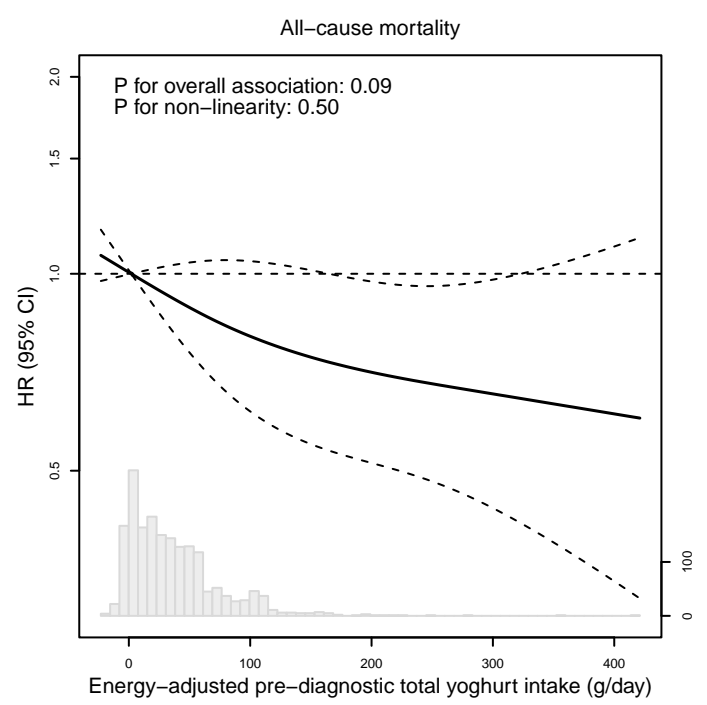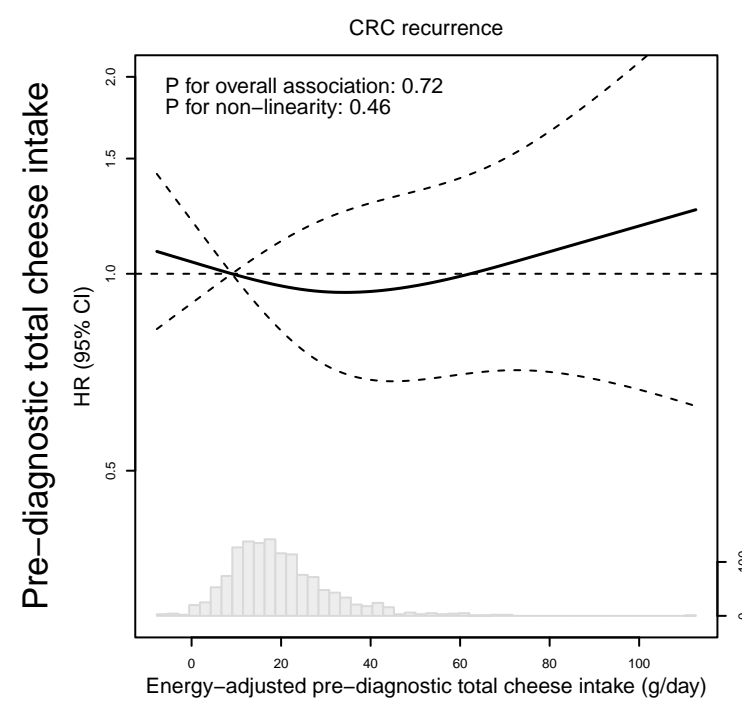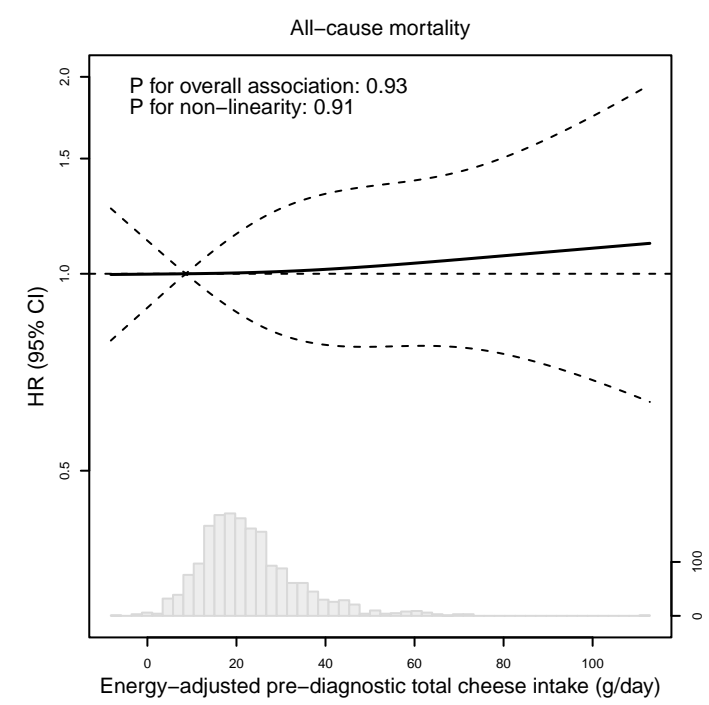

**Post-diagnostic total yoghurt intake**

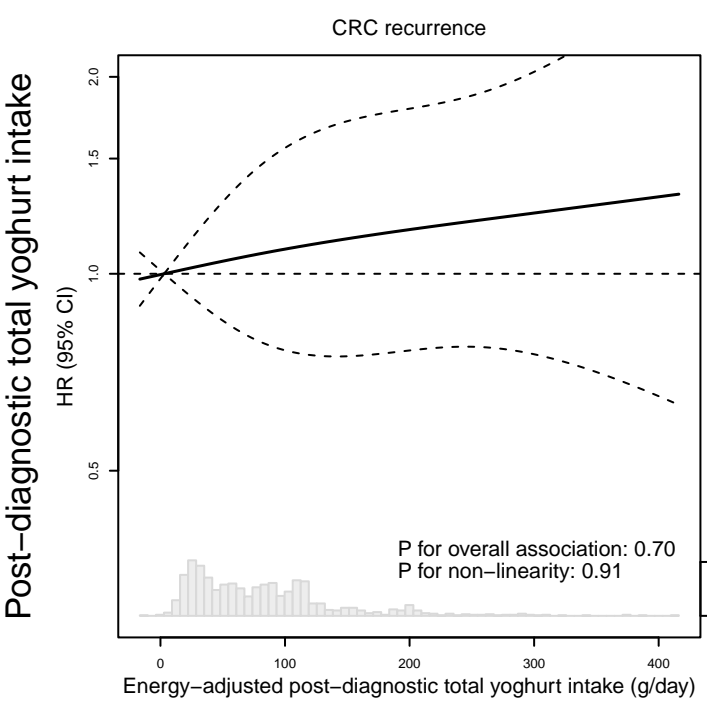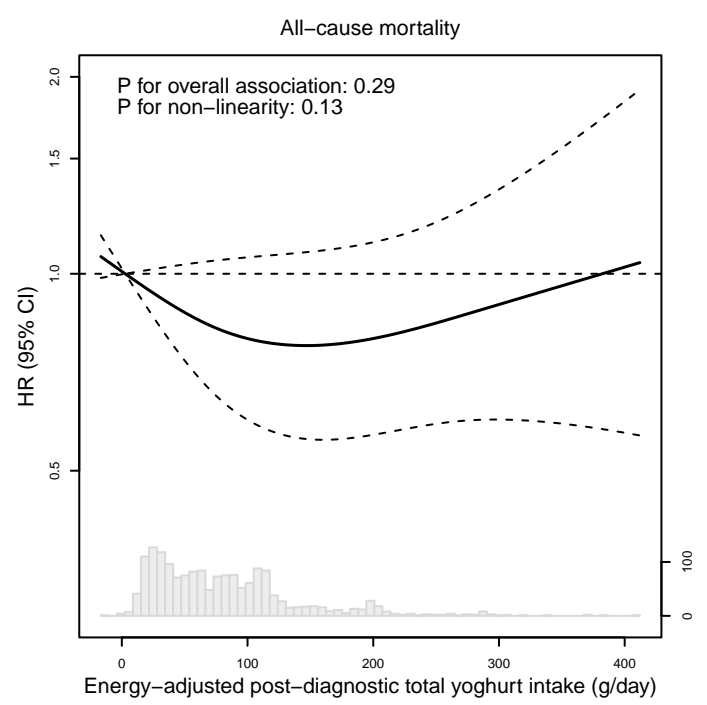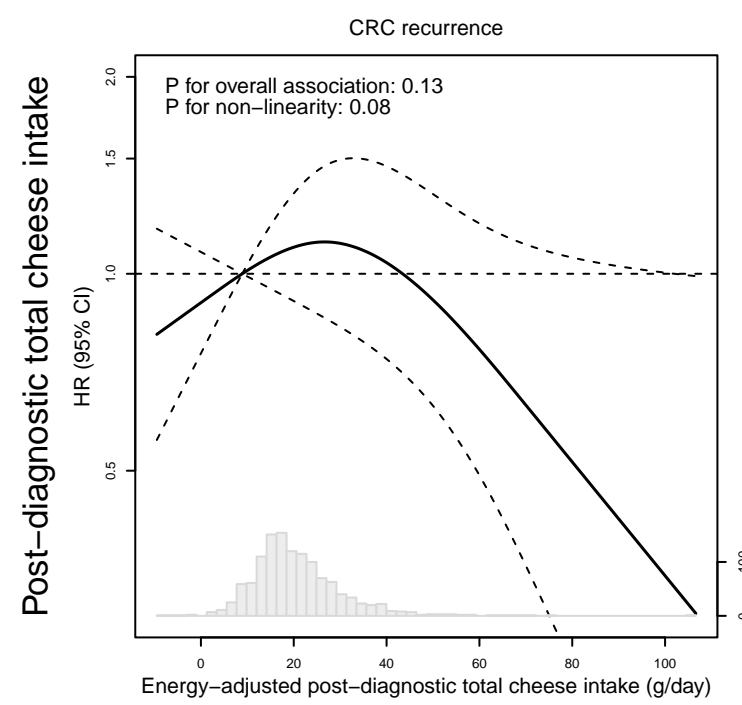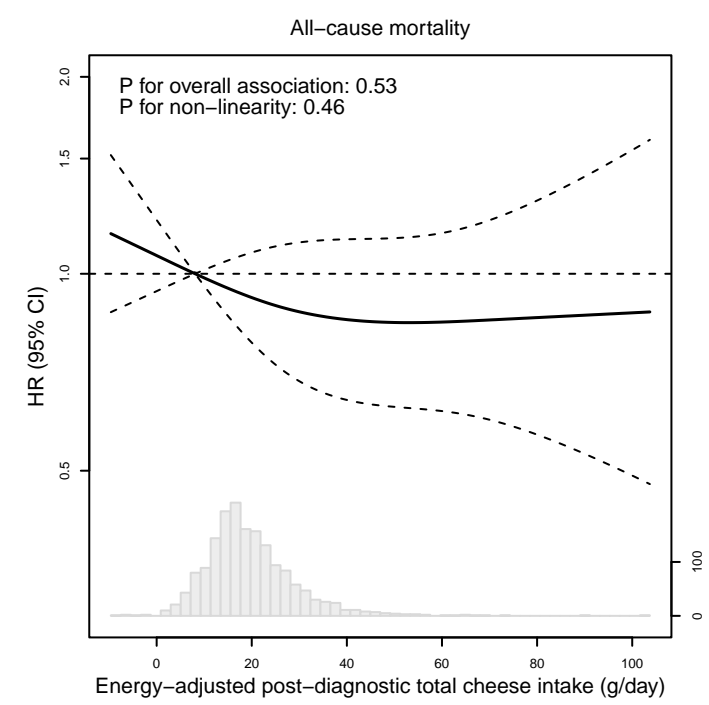

Supplement: 394_2023_3201_MOESM1_ESM.pdf [file 394_2023_3201_MOESM1_ESM.pdf]
